# Supplementary material for: Direct C–H bond arylation of arenes with aryltin reagents catalysed by palladium complexes
Source: Royal Society of Chemistry journal article supplement (doi:10.1039/b717251f), 2008-01-01
Supplement: b717251f.pdf [file b717251f.pdf]

## Direct C-H Arylation of Arenes with Aryltin Reagents Catalyzed by Palladium Complexes

Hiroshi Kawai, Yasuhiro Kobayashi, Shuichi Oi,\* and Yoshio Inoue\*

*Department of Biomolecular Engineering, Graduate School of Engineering, Tohoku University,  
Sendai 980-8579, Japan*

**General.** Infrared (IR) spectra were recorded on a JASCO FT/IR-350 Fourier transform infrared spectrophotometer. NMR spectra were recorded on a Bruker DRX-500 spectrometer. High resolution mass spectra (HRMS) were obtained on a HITACH M2500S. All reactions were performed in Vial tubes under a N<sub>2</sub> atmosphere. Aryltin trichlorides (**2b–2e**) were prepared as described in the literatures.<sup>1</sup> CuCl<sub>2</sub> was dried at 150 °C under reduced pressure and stored under N<sub>2</sub>. Flash chromatographies were performed using spherical silica gel (40-100 μm, Kanto Chemical).

**Reaction of Phenanthrene (1b) with Phenyltin trichloride (2a).** A mixture of **1b** (89.1 mg, 0.50 mmol), **2a** (302.2 mg, 1.00 mmol), CuCl<sub>2</sub> (269.0 mg, 2.0 mmol) and PdCl<sub>2</sub> (4.4 mg, 0.025 mmol) in 1 mL of dried 1,2-dichloroethane was stirred at 80 °C for 16 h. The reaction mixture was quenched with water (1 mL). The organic layer was separated with 30 mL of Et<sub>2</sub>O. After the solvent was removed in *vacuo*, the residue was purified by silica gel flash chromatography (hexane) to give **3ba** (101.6 mg, 0.40 mmol).

**Reaction of Tetraline (1d) with Phenyltin trichloride (2a).** To a mixture of **1d** (66.1 mg, 0.50 mmol), CuCl<sub>2</sub> (538.0 mg, 4.0 mmol) and PdCl<sub>2</sub> (4.4 mg, 0.025 mmol) in 1 mL of dried 1,2-dichloroethane, **2a** (604.4 mg, 2.00 mmol) was added dropwise over 11 h at 80 °C with stirring. After 5 h of additional stirring, the reaction mixture was quenched with water (1 mL). The organic layer was separated with 30 ml of Et<sub>2</sub>O. After the solvent was removed in *vacuo*, the residue was purified by silica gel flash chromatography (hexane) and preparative GPC to give **3da** (48.9 mg,

0.23 mmol) and **4da** (21.2 mg, 0.05 mmol).

### 1-Phenylnaphthalene (**3aa- $\alpha$** ).<sup>2</sup>

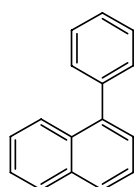

<sup>1</sup>H-NMR (500 MHz, CDCl<sub>3</sub>):  $\delta$  (ppm) 7.91-7.88 (m, 2H), 7.85 (d,  $J$  = 8.2 Hz, 1H), 7.52-7.46 (m, 6H), 7.43-7.40 (m, 3H). <sup>13</sup>C-NMR (125 MHz, CDCl<sub>3</sub>):  $\delta$  (ppm) 140.7, 140.2, 133.8, 131.6, 130.0, 128.7, 128.2, 127.6, 127.2, 127.1, 126.9, 126.0, 125.7, 125.4. IR (neat): 3055, 1949, 1393, 777, 701 cm<sup>-1</sup>.

### 2-Phenylnaphthalene (**3aa- $\beta$** ).<sup>3</sup>

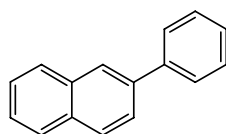

<sup>1</sup>H-NMR (500 MHz, CDCl<sub>3</sub>):  $\delta$  (ppm) 8.05 (d,  $J$  = 1.7 Hz, 1H), 7.93-7.86 (m, 3H), 7.75 (dd,  $J$  = 8.6, 1.7 Hz, 1H), 7.74-7.72 (m, 2H), 7.52-7.47 (m, 4H), 7.40-7.37 (m, 1H). <sup>13</sup>C-NMR (125 MHz, CDCl<sub>3</sub>):  $\delta$  (ppm) 141.1, 138.5, 133.6, 132.6, 128.8, 128.4, 128.2, 127.6, 127.4, 127.3, 126.3, 125.9, 125.8, 125.6. IR (KBr): 3057, 1949, 1495, 1454, 822, 763, 690 cm<sup>-1</sup>.

### 1,4-Diphenylnaphthalene (**4aa-1,4-Ph**).<sup>4</sup>

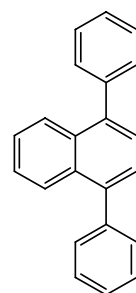

<sup>1</sup>H-NMR (500 MHz, CDCl<sub>3</sub>):  $\delta$  (ppm) 7.99-7.95 (m, 2H), 7.55-7.49 (m, 8H), 7.47 (s, 2H), 7.46-7.42 (m, 4H). <sup>13</sup>C-NMR (125 MHz, CDCl<sub>3</sub>):  $\delta$  (ppm) 140.8, 139.8, 131.9, 130.1, 128.3, 127.3, 126.4, 126.4, 125.8. IR (KBr): 3052, 1949, 1491, 1384, 774, 770 cm<sup>-1</sup>. Although other regioisomers of **4aa** were also obtained, substitution patterns of these isomers could not be determined. HRMS spectra for a mixture of these isomers were in agreement with the molecular formula of **4aa**.

### 9-Phenylphenanthrene (**3ba**).<sup>5</sup>

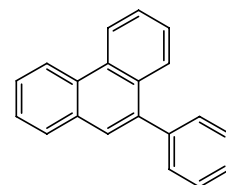

<sup>1</sup>H-NMR (500 MHz, CDCl<sub>3</sub>):  $\delta$  (ppm) 8.75 (d,  $J$  = 8.3 Hz, 1H), 8.70 (d,  $J$  = 8.4 Hz, 1H), 7.91 (d,  $J$  = 8.3 Hz, 1H), 7.87 (d,  $J$  = 8.4 Hz, 1H), 7.67 (s, 1H), 7.66-7.63 (m, 2H), 7.61-7.57 (m, 1H), 7.55-7.48 (m, 5H), 7.46-7.42 (m, 1H). <sup>13</sup>C-NMR (125 MHz, CDCl<sub>3</sub>):  $\delta$  (ppm) 140.8, 138.8, 131.5, 131.1, 130.6,

130.0, 129.9, 128.6, 128.3, 127.5, 127.3, 126.9, 126.8, 126.6, 126.5, 126.4, 122.9, 122.5. IR (KBr): 3071, 1487, 1445, 698  $\text{cm}^{-1}$ .

**9-(4-Tolyl)phenanthrene (3bb).**

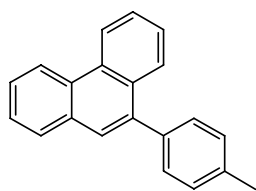

$^1\text{H-NMR}$  (500 MHz,  $\text{CDCl}_3$ ):  $\delta$  (ppm) 8.76 (d,  $J = 8.2$  Hz, 1H), 8.70 (d,  $J = 8.1$  Hz, 1H), 7.95-7.93 (m, 1H), 7.88-7.86 (m, 1H), 7.66-7.63 (m, 3H), 7.61-7.58 (m, 1H), 7.54-7.50 (m, 1H), 7.43 (d,  $J = 7.9$  Hz, 2H), 7.32 (d,  $J = 7.9$  Hz, 2H), 2.46 (s, 3H).  $^{13}\text{C-NMR}$  (125 MHz,  $\text{CDCl}_3$ ):  $\delta$  (ppm) 138.7, 137.8, 137.0, 131.6, 131.2, 130.6, 129.9, 129.9, 129.0, 128.6, 127.4, 126.9, 126.8, 126.4, 126.4, 126.4, 122.9, 122.5, 21.3. IR (KBr): 3021, 1507, 1448, 820, 771  $\text{cm}^{-1}$ . HRMS (EI) calcd for  $\text{C}_{21}\text{H}_{16}$ : 268.1252; found: 268.1251.

**9-(2-Tolyl)phenanthrene (3bc).**

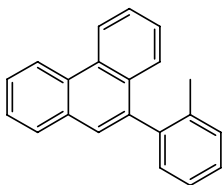

$^1\text{H-NMR}$  (500 MHz,  $\text{CDCl}_3$ ):  $\delta$  (ppm) 8.74 (d,  $J = 8.3$  Hz, 1H), 8.71 (d,  $J = 8.3$  Hz, 1H), 7.86 (d,  $J = 7.8$  Hz, 1H), 7.67-7.58 (m, 4H), 7.50-7.45 (m, 2H), 7.38-7.30 (m, 4H), 2.05 (s, 3H).  $^{13}\text{C-NMR}$  (125 MHz,  $\text{CDCl}_3$ ):  $\delta$  (ppm) 140.2, 138.4, 137.0, 131.6, 131.3, 130.3, 130.3, 130.0, 129.9, 128.6, 127.7, 127.1, 126.8, 126.8, 126.6, 126.5, 126.4, 125.7, 122.8, 122.5, 20.0. IR (KBr): 3060, 1489, 1449, 753, 728  $\text{cm}^{-1}$ . HRMS (EI) calcd for  $\text{C}_{21}\text{H}_{16}$ : 268.1252; found: 268.1250.

**9-(4-Fluorophenyl)phenanthrene (3bd).**

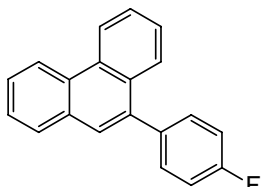

$^1\text{H-NMR}$  (500 MHz,  $\text{CDCl}_3$ ):  $\delta$  (ppm) 8.75 (d,  $J = 8.2$  Hz, 1H), 8.69 (d,  $J = 8.3$  Hz, 1H), 7.86-7.83 (m, 2H), 7.66-7.63 (m, 3H), 7.61-7.59 (m, 1H), 7.54-7.51 (m, 1H), 7.50-7.46 (m, 2H), 7.21-7.15 (m, 2H).  $^{13}\text{C-NMR}$  (125 MHz,  $\text{CDCl}_3$ ):  $\delta$  (ppm) 162.3 (d,  $J_{\text{C-F}} = 244.6$  Hz), 137.7, 136.7 (d,  $J_{\text{C-F}} = 3.6$  Hz), 131.6 (d,  $J_{\text{C-F}} = 7.9$  Hz), 131.4, 131.1, 130.6, 130.0, 128.6, 127.7, 126.9, 126.7, 126.7, 126.6, 126.5, 123.0, 122.5, 115.2 (d,  $J_{\text{C-F}} = 21.1$  Hz). IR (KBr): 3061, 1501, 1213, 834, 752  $\text{cm}^{-1}$ . HRMS (EI) calcd for  $\text{C}_{20}\text{H}_{13}\text{F}$ : 272.1001; found: 272.0999.

**9-(4-Trifluoromethylphenyl)phenanthrene (3be).**

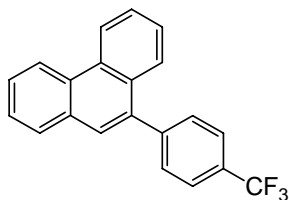

$^1\text{H-NMR}$  (500 MHz,  $\text{CDCl}_3$ ):  $\delta$  (ppm) 8.77 (d,  $J = 8.3$  Hz, 1H), 8.71 (d,  $J = 8.3$  Hz, 1H), 7.88-7.87 (m, 1H), 7.81-7.79 (m, 1H), 7.76 (d,  $J = 8.0$  Hz, 2H), 7.69-7.61 (m, 6H), 7.55-7.52 (m, 1H).  $^{13}\text{C-NMR}$  (125 MHz,  $\text{CDCl}_3$ ):  $\delta$  (ppm) 144.5, 137.3, 131.2, 130.6, 130.5, 130.4, 130.1, 129.6 (q,  $J_{\text{C-F}} = 32.3$  Hz), 128.8, 127.8, 127.0, 127.0, 126.7, 126.7, 126.4, 125.3 (q,  $J_{\text{C-F}} = 3.8$  Hz), 124.3 (q,  $J_{\text{C-F}} = 270.5$  Hz), 123.0, 122.6. IR (KBr): 3061, 1615, 1325, 1117, 842  $\text{cm}^{-1}$ . HRMS (EI) calcd for  $\text{C}_{21}\text{H}_{13}\text{F}_3$ : 322.0969; found: 322.0966.

**Mixture of 3-phenylfluoranthene and 2-phenylfluoranthene (3ca).**

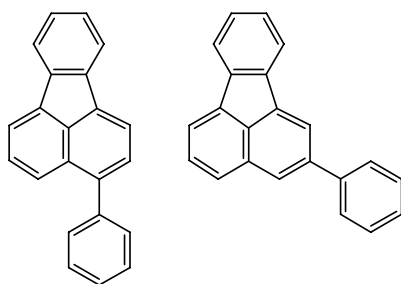

$^1\text{H-NMR}$  (500 MHz,  $\text{CDCl}_3$ ) Peaks for **3-Ph**:  $\delta$  (ppm) 7.95 (d,  $J = 7.1$  Hz, 1H), 7.94-7.89 (m, 4H), 7.61-7.57 (m, 4H), 7.52-7.49 (m, 2H), 7.45-7.42 (m, 1H), 7.39-7.36 (m, 2H). Peaks for **2-Ph**: 8.16 (d,  $J = 1.1$  Hz, 0.20 H), 7.99 (d,  $J = 1.1$  Hz, 0.20 H), 7.85-7.84 (m, 0.20H), 7.76-7.75 (m, 0.40H), 7.64-7.62 (m, 0.2H).  $^{13}\text{C-NMR}$  (125 MHz,  $\text{CDCl}_3$ ):  $\delta$  (ppm) 142.0, 141.6, 140.2, 139.8, 139.7, 139.5, 139.3, 139.1, 137.5, 137.0, 136.8, 136.3, 132.7, 131.8, 130.3, 130.0, 129.8, 128.9, 128.6, 128.4, 128.3, 128.0, 127.8, 127.7, 127.6, 127.5, 127.4, 127.4, 126.8, 125.6, 125.1, 121.6, 121.6, 121.5, 121.4, 120.2, 120.0. IR (KBr): 3055, 1444, 761, 700  $\text{cm}^{-1}$ . HRMS (EI) calcd for  $\text{C}_{22}\text{H}_{14}$ : 278.1096; found: 278.1093.

**Mixture of 2,4-diphenylfluoranthene, 3,4-diphenylfluoranthene and 2,5-diphenylfluoranthene (4ca).**

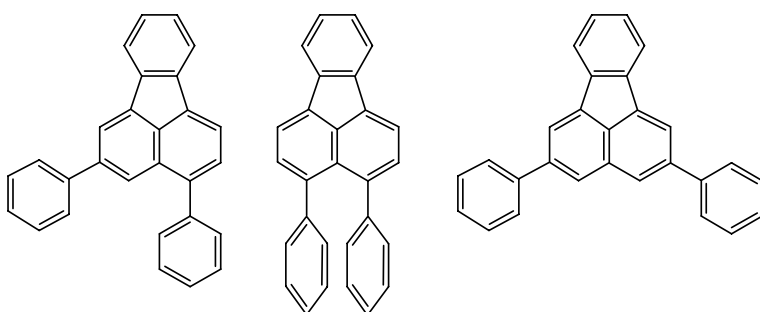

$^1\text{H-NMR}$  (500 MHz,  $\text{CDCl}_3$ ) Peaks for **2,4-Ph**:  $\delta$  (ppm) 8.17 (d,  $J = 1.0$  Hz, 1H), 8.09 (d,  $J = 1.0$  Hz, 1H), 7.93 (d,  $J = 7.1$  Hz, 1H), 7.91-7.89 (m, 2H), 7.68-7.66 (m, 2H), 7.63-7.61

(m, 2H), 7.60 (d,  $J = 7.1$  Hz, 1H), 7.52-7.50 (m, 2H), 7.50-7.42 (m, 3H), 7.41-7.35 (m, 3H). Peaks for **3,4-Ph**: 7.96 (d,  $J = 7.1$  Hz, 1.84H), 7.95-7.92 (m, 1.84H), 7.52 (d,  $J = 7.1$  Hz, 1.84H), 7.41-7.37 (m, 1.84H), 7.02-7.00 (m, 3.68H), 6.97-6.90 (m, 5.52H). Peaks for **2,5-Ph**: 8.13 (d,  $J = 0.9$  Hz, 0.18H), 8.02 (d,  $J = 0.9$  Hz, 0.18H), 7.78-7.75 (m, 0.36H).  $^{13}\text{C-NMR}$  (125 MHz,  $\text{CDCl}_3$ ):  $\delta$ (ppm) 142.1, 141.8, 141.2, 140.4, 139.7, 139.5, 139.4, 139.2, 137.7, 136.6, 136.1, 133.6, 132.0, 130.3, 129.9, 129.1, 128.9, 128.8, 128.4, 128.3, 127.8, 127.7, 127.5, 127.4, 127.4, 127.1, 126.5, 125.9, 125.2, 124.0, 121.7, 121.5, 121.5, 121.2, 120.1, 112.0, 119.8. IR (KBr): 3053, 1445, 842, 756, 700  $\text{cm}^{-1}$ . HRMS (EI) calcd for  $\text{C}_{28}\text{H}_{18}$ : 354.1409; found: 354.1403.

**Mixture of 5-phenyl-1,2,3,4-tetrahydronaphthalene<sup>6</sup> and 6-phenyl-1,2,3,4-tetrahydronaphthalene (3da).<sup>7</sup>**

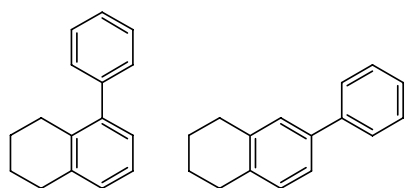

$^1\text{H-NMR}$  (500 MHz,  $\text{CDCl}_3$ ) Peaks for **5-Ph**:  $\delta$  (ppm) 7.41-7.38 (m, 2H), 7.34-7.25 (m, 3H), 7.16 (t,  $J = 7.5$  Hz, 1H), 7.10 (d,  $J = 7.5$  Hz, 1H), 7.03 (d,  $J = 7.5$  Hz, 1H), 2.86 (t,  $J = 6.4$  Hz, 2H), 2.58 (t,  $J = 6.4$  Hz, 2H), 1.81-1.77 (m, 2H), 1.73-1.68 (m, 2H).

Peaks for **6-Ph**: 7.58-7.56 (m, 0.32H), 7.43-7.40 (m, 0.32H), 7.15-7.13 (m, 0.16H), 2.82-2.80 (m, 0.64H), 1.84-1.81 (m, 0.64H).  $^{13}\text{C-NMR}$  (125 MHz,  $\text{CDCl}_3$ ):  $\delta$  (ppm) 142.1, 142.0, 141.3, 138.5, 137.4, 136.3, 134.8, 129.5, 129.2, 128.6, 128.4, 127.9, 127.8, 127.1, 127.0, 126.9, 126.6, 125.2, 124.3, 29.9, 29.5, 29.1, 28.2, 23.3, 23.2, 22.9. IR (neat): 3051, 2928, 1454, 759, 701  $\text{cm}^{-1}$ .

**5,8-Diphenyl-1,2,3,4-tetrahydronaphthalene (4da).**

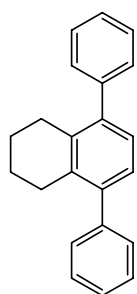

$^1\text{H-NMR}$  (500 MHz,  $\text{CDCl}_3$ ):  $\delta$  (ppm) 7.43-7.40 (m, 4H), 7.36-7.33 (m, 6H), 7.11 (s, 2H), 2.67 (s, 4H), 1.69 (s, 4H).  $^{13}\text{C-NMR}$  (125 MHz,  $\text{CDCl}_3$ ):  $\delta$  (ppm) 142.1, 142.3, 135.1, 129.3, 128.0, 126.8, 126.7, 28.6, 22.9. IR (KBr): 3056, 2930, 2858, 1460, 763, 702  $\text{cm}^{-1}$ . HRMS (EI) calcd for  $\text{C}_{22}\text{H}_{20}$ : 284.1565; found: 284.1562.

**2,3,4-Trimethylbiphenyl (3ea).**<sup>8</sup>

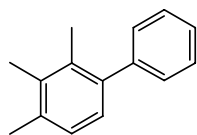

<sup>1</sup>H-NMR (500 MHz, CDCl<sub>3</sub>): δ (ppm) 7.39-7.36 (m, 2H), 7.32-7.27 (m, 3H), 7.05 (d, *J* = 7.7 Hz, 1H), 7.00 (d, *J* = 7.7 Hz, 1H), 2.33 (s, 3H), 2.24 (s, 3H), 2.17 (s, 3H). <sup>13</sup>C-NMR (125 MHz, CDCl<sub>3</sub>): δ (ppm) 142.9, 140.2, 135.6, 135.4, 133.8, 129.5, 127.9, 127.0, 126.4, 126.4, 20.8, 17.6, 16.0. IR (neat): 2921, 1602, 1474, 764, 703 cm<sup>-1</sup>.

**Mixture of 2,3-dimethylbiphenyl and 3,4-dimethylbiphenyl (3fa).**<sup>9</sup>

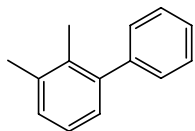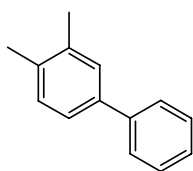

<sup>1</sup>H-NMR (500 MHz, CDCl<sub>3</sub>) Peaks for **3-Ph**: δ (ppm) 7.41-7.37 (m, 2H), 7.34-7.29 (3H), 7.17-7.12 (m, 2H), 7.09-7.08 (m, 1H), 2.34 (s, 3H), 2.15 (s, 3H). Peaks for **4-Ph**: 7.59-7.56 (m, 0.64H), 7.43-7.40 (m, 0.64H), 7.21-7.19 (m, 0.32H), 2.33 (s, 0.96H), 2.30 (s, 0.96H). <sup>13</sup>C-NMR (125 MHz, CDCl<sub>3</sub>): δ (ppm) 142.5, 142.2, 141.3, 138.9, 137.2, 136.9, 135.7, 134.0, 130.0, 129.4, 128.8, 128.7, 128.4, 127.9, 127.6, 127.0, 126.9, 126.6, 125.2, 124.5, 20.7, 19.9, 19.4, 17.0. IR (neat): 3056, 2939, 1464, 760, 701 cm<sup>-1</sup>. HRMS (EI) calcd for C<sub>14</sub>H<sub>14</sub>: 182.1096; found: 182.1094.

**2,4-Dimethylbiphenyl (3ga).**<sup>10</sup>

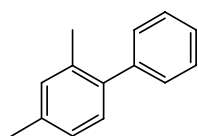

<sup>1</sup>H-NMR (500 MHz, CDCl<sub>3</sub>): δ (ppm) 7.41-7.38 (m, 2H), 7.33-7.30 (m, 3H), 7.13 (d, *J* = 7.7 Hz, 1H), 7.10 (s, 1H), 7.06 (d, *J* = 7.7 Hz, 1H), 2.37 (s, 3H), 2.25 (s, 3H). <sup>13</sup>C-NMR (125 MHz, CDCl<sub>3</sub>): δ (ppm) 141.9, 139.1, 136.9, 135.1, 131.1, 129.7, 129.3, 128.0, 126.6, 126.4, 21.0, 20.4. IR (neat): 2921, 1482, 765, 703 cm<sup>-1</sup>.

**2,5-Dimethylbiphenyl (3ha).**<sup>11</sup>

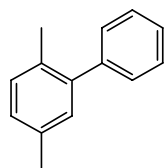

<sup>1</sup>H-NMR (500 MHz, CDCl<sub>3</sub>): δ (ppm) 7.41-7.38 (m, 2H), 7.34-7.30 (m, 3H), 7.16 (d, *J* = 7.6 Hz, 1H), 7.07 (d, *J* = 7.6 Hz, 1H), 7.06 (s, 1H), 2.35 (s, 3H), 2.23 (s, 3H). <sup>13</sup>C-NMR (125 MHz, CDCl<sub>3</sub>): δ (ppm) 142.1, 141.7, 135.1, 132.1, 130.5, 130.2, 129.1, 128.0, 127.9, 126.6, 20.9, 19.9. IR (neat): 3024, 2922,

1487, 1444, 811, 702 cm<sup>-1</sup>.

## References

- 1 (a) K. Fugami, K. Kawata, T. Enokido, Y. Mishiba, S. Hagiwara, Y. Hirunuma, D. Koyama, M. Kameyama and M. Kosugi, *J. Organomet. Chem.*, 2000, **611**, 433; (b) D. A. Powell, T. Maki and G. C. Fu, *J. Am. Chem. Soc.*, 2005, **127**, 516.
- 2 S. Riggelman and P. DeShong, *J. Org. Chem.*, 2003, **68**, 8106.
- 3 Z.-Y. Tang and Q.-S. Hu, *J. Am. Chem. Soc.*, 2004, **126**, 3058.
- 4 G. W. Kabalka, Y. Ju and Z. Wu, *J. Org. Chem.*, 2003, **68**, 7915.
- 5 K. Kanno, Y. Liu, A. Iesato, K. Nakajima and T. Takahashi, *Org. Lett.*, 2005, **7**, 5453.
- 6 V. B. Kurteva, A. G. Santos and C. A. M. Afonso, *Org. Biomol. Chem.*, 2004, **2**, 514.
- 7 N. Asao, T. Nogami, S. Lee and Y. Yamamoto, *J. Am. Chem. Soc.*, 2003, **125**, 10921.
- 8 M. P. Hartshorn, M. P. Judd, R. J. Martyn, W. T. Robinson, G. J. Wright and R. W. Vannoort, *Aust. J. Chem.*, 1990, **43**, 1519.
- 9 K. W. Anderson and S. W. Buchwald, *Angew. Chem. Int. Ed.*, 2005, **44**, 6173.
- 10 A. K. Sahoo, T. Oda, Y. Nakao and T. Hiyama, *Adv. Synth. Catal.*, 2004, **346**, 1715.
- 11 D. Liu, W. Gao, Q. Dai and X. Zhang, *Org. Lett.*, 2005, **7**, 4907.
